# Supplementary material
Source: publisher site journal article supplement (https://www.dovepress.com/article/446594)
Supplement: Supplementary file 1 [file get_supplementary_file.php]

**Methods and materials**

**1.1 Lipidomic analysis of DAELNs**

A mixture of 300 μl methanol and 1 ml methyl tert-butyl ether was added to 100 μl DAELNs, followed by rotation for 1 hr. Subsequently, 300 μl high-performance liquid chromatography (HPLC)-grade water was added to the sample, which was then gently inverted and centrifuged at 12,000 rpm for 10 min. The methyl tert-butyl ether phase was collected, concentrated under nitrogen to dryness, and reconstituted in 100 μl Isopropyl alcohol: acetonitrile (1:1). The extracted lipid was analyzed using LC-MS/MS. Separation of lipids was performed using a Diamonsil 5 μm C18 column (4.6 mm*150 mm). Ultrahigh-performance liquid chromatography was carried out with a 30-minute gradient. The mobile phase A is acetonitrile: water = 6:4, 0.1% formic acid, and 5 mM ammonium acetate; while the mobile phase B is isopropanol: acetonitrile=9:1, 0.1% formic acid, and 5 mM ammonium acetate. Both positive and negative ion modes of electrospray ionization (ESI) were used for detection. The acquired data were processed using MS-DIAL 4.70 software.

**1.2 Metabonomic analysis of DAELNs**

1 ml methanol was added to 100 μl DAELNs, followed by ultraphonic for 30 min and centrifuged at 12,000 rpm for 10 min. The extracted metabolite was analyzed using LC-MS/MS. Separation of metabolite was performed using a Sepax GP-C18 Column (1.8 µm 120Å 2.1 mm*150 mm). Ultrahigh-performance liquid chromatography was carried out with a 21-minute gradient. The mobile phase A is 0.1% formic acid and Mobile phase B is 100% ACN. Both positive and negative ion modes of electrospray ionization (ESI) were used for detection. The acquired data were processed using MS-DIAL 4.70 software.

**Results**


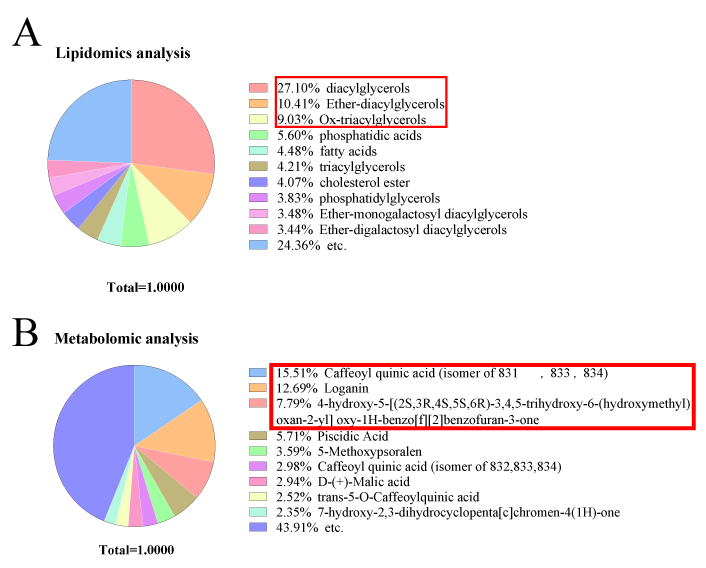


**Supplemental Figure 1.** **The lipidomic and metabolic analysis of DALENs.**

(A) Lipidomic analysis of the DAELNs. (B) Metabolic analysis of the DAELNs.
